# Supplementary material
Source: Springer Nature journal article supplement (https://www.springermedizin.de/resource/supplementary/12885_2009_2090_MOESM9_ESM.pdf/9460502)

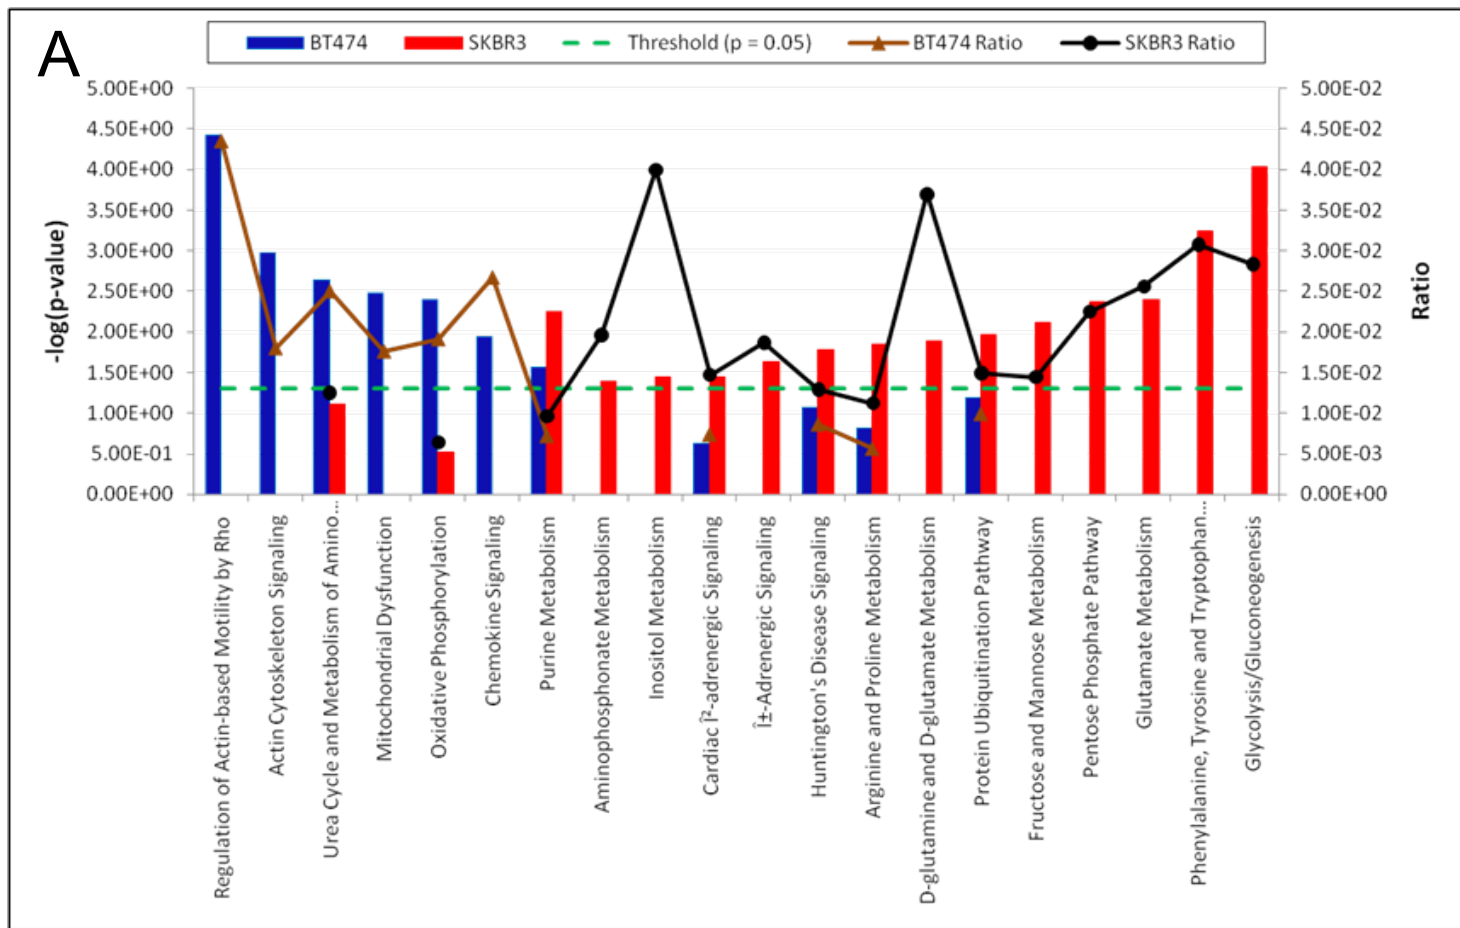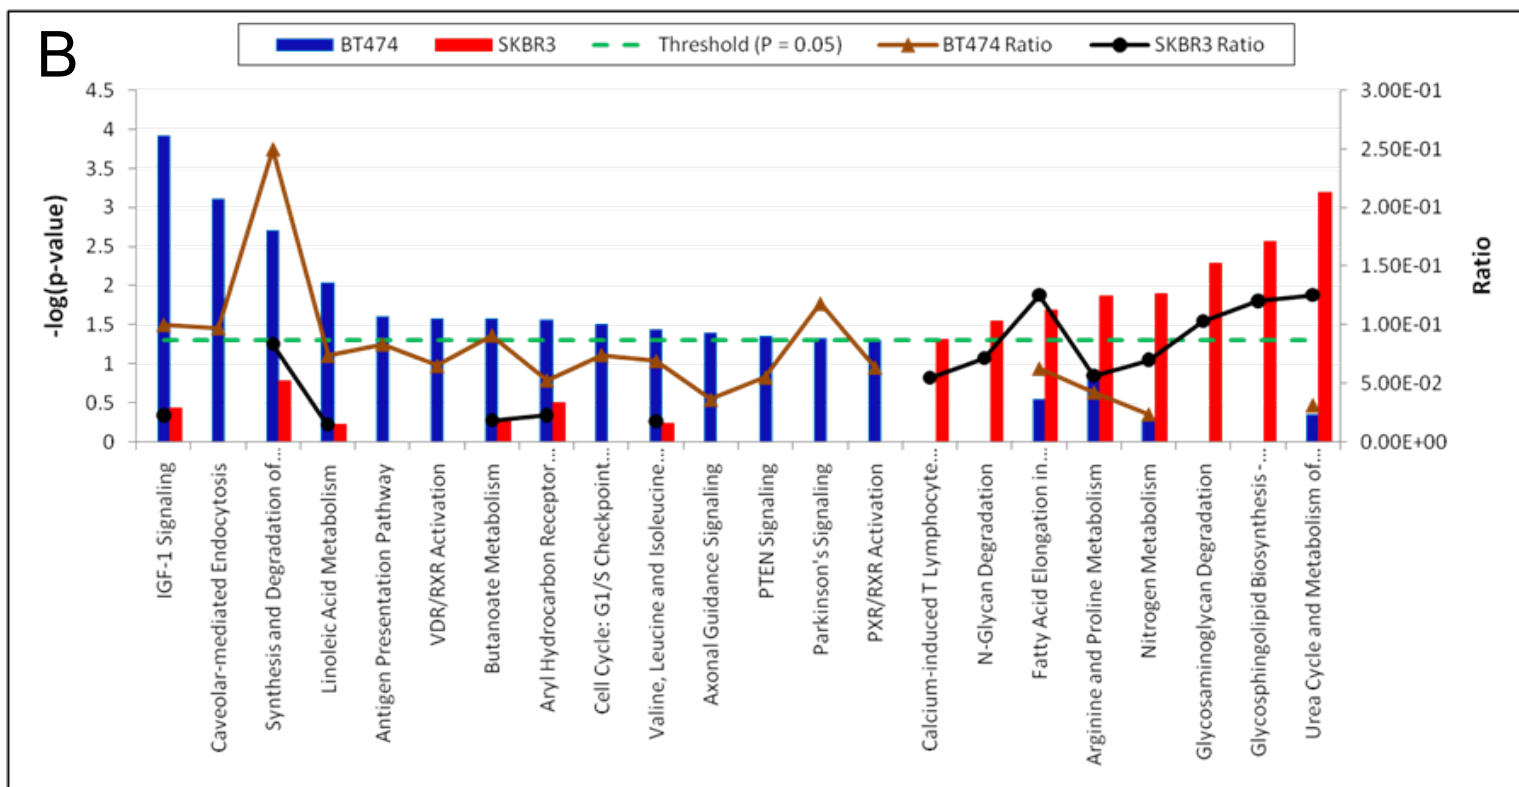

Supplement: MOESM9 [file 9460502]
